# Supplementary material for: Role of liver support systems in the management of post hepatectomy liver failure: A systematic review of the literature
Source: PubMed Central journal article supplement — Ann Hepatobiliary Pancreat Surg. 2021 May 31;25(2):171–8. doi: 10.14701/ahbps.2021.25.2.171 (PMC8180400; doi:10.14701/ahbps.2021.25.2.171), 2021-05-31
Supplement: ahbps-25-2-171_Supple.pdf [file ahbps-25-2-171_Supple.pdf]

**Supplementary Table 1.** Search terms used to search MEDLINE and Embase results of systematic searches broken down by individual term

|    | Search terms: Liver support systems      | Number of results (Medline) | Number of results (Embase) |
|----|------------------------------------------|-----------------------------|----------------------------|
| 1  | PHLF                                     | 125                         | 351                        |
| 2  | Post Hepatectomy Liver Failure           | 110                         | 320                        |
| 3  | Hepatectomy AND Liver Failure            | 1710                        | 3106                       |
| 4  | Liver Support System                     | 303                         | 1845                       |
| 5  | Extracorporeal Liver Support             | 194                         | 882                        |
| 6  | MARS                                     | 4854                        | 7196                       |
| 7  | Molecular Adsorbent Recirculating System | 239                         | 413                        |
| 8  | Plasma exchange                          | 8961                        | 14965                      |
| 9  | Plasmapheresis                           | 11792                       | 37628                      |
| 10 | Prometheus                               | 325                         | 1020                       |
| 11 | Bio-artificial Liver Support System      | 77                          | 132                        |
| 12 | 1 OR 2 OR 3                              | 1728                        | 3189                       |
| 13 | 4 OR 5 OR 6 OR 7 OR 8 OR 9 OR 10 OR 11   | 24641                       | 53004                      |
| 14 | 12 AND 13                                | 39                          | 57                         |

**Supplementary Table 2.** Risk of bias of the included studies

| Study                                       | Bias domain |           |                             |                                      |              |                         |                              | Overall bias |
|---------------------------------------------|-------------|-----------|-----------------------------|--------------------------------------|--------------|-------------------------|------------------------------|--------------|
|                                             | Confounding | Selection | Intervention classification | Deviation from intended intervention | Missing data | Measurement of outcomes | Selection of reported result |              |
| Asanuma et al. (2003) <sup>23</sup>         | Low         | Low       | Moderate                    | N/A                                  | Low          | Low                     | Low                          | Low          |
| Chiu et al. (2006) <sup>18</sup>            | Moderate    | Moderate  | Low                         | N/A                                  | Low          | Low                     | Low                          | Moderate     |
| Gilg et al. (2018) <sup>19</sup>            | Low         | Low       | Low                         | N/A                                  | Low          | Low                     | Low                          | Low          |
| Lee et al. (2017) <sup>24</sup>             | Moderate    | Serious   | Low                         | Low                                  | Low          | Low                     | Low                          | Moderate     |
| Rusu et al. (2009) <sup>20</sup>            | Moderate    | Moderate  | Low                         | Moderate                             | Serious      | Moderate                | Low                          | Serious      |
| Saliba et al. (2013) <sup>21</sup>          | N/A         | N/A       | N/A                         | N/A                                  | N/A          | N/A                     | N/A                          | N/A          |
| Usami et al. (1989) <sup>25</sup>           | Moderate    | Low       | Low                         | Moderate                             | Low          | Low                     | Low                          | Low          |
| van de Kerkhove et al. (2003) <sup>22</sup> | N/A         | N/A       | N/A                         | N/A                                  | N/A          | N/A                     | N/A                          | N/A          |
| Yonekawa et al. (2005) <sup>26</sup>        | Moderate    | Low       | Low                         | Moderate                             | Low          | Low                     | Low                          | Low          |
